# Supplementary material
Source: PubMed Central journal article supplement (PMC2937760)
Supplement: supp_84_19_9889__1.pdf [file supp_84_19_9889__1.pdf]

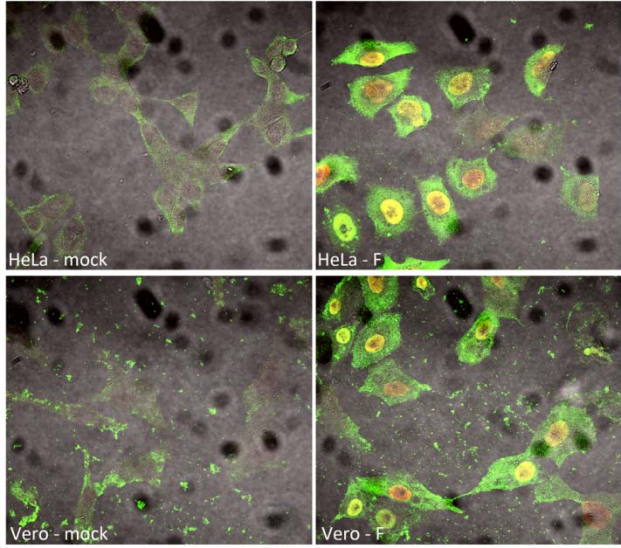

1

2 **Figure S1**

3 **Immunoreactivity of Myosin Va is increased during HSV-1 Infection in Multiple Cell types.** HeLa and  
 4 Vero cells were mock infected or infected with 5 PFU HSV-1(F) per cell and fixed at 6 hpi. Cells were  
 5 washed with PBS and fixed in 3% PFA for 15 minutes and permeabilized with 0.1% Triton-X 100. The  
 6 fixed permeabilized cells were immunostained with goat anti-myoVa and rabbit anti-ICP8 antibodies.  
 7 Single sections of immunostained cells were digitally collected with an Olympus confocal microscope.  
 8 Green: anti-myosin Va; red: anti-ICP8.

9

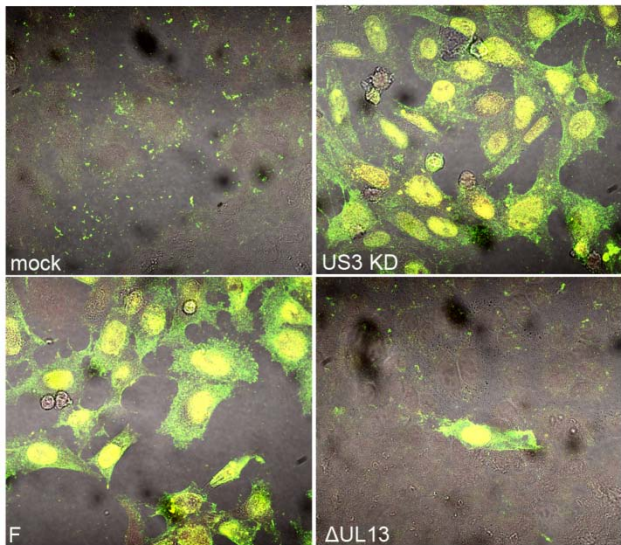

10

11 **Figure S2**

12 **Viral kinases pU<sub>5</sub>3 and pU<sub>L</sub>13 are not required for Increased Immunoreactivity of Myosin Va during**  
13 **HSV-1 Infection.** HEp-2 cells were mock infected or infected with HSV-1(F), U<sub>5</sub>3 kinase dead or ΔU<sub>L</sub>13  
14 and fixed at 18 hpi. Cells were immunostained and photographed as described in S1. Green: anti-myosin  
15 Va; red: anti-ICP8.

16

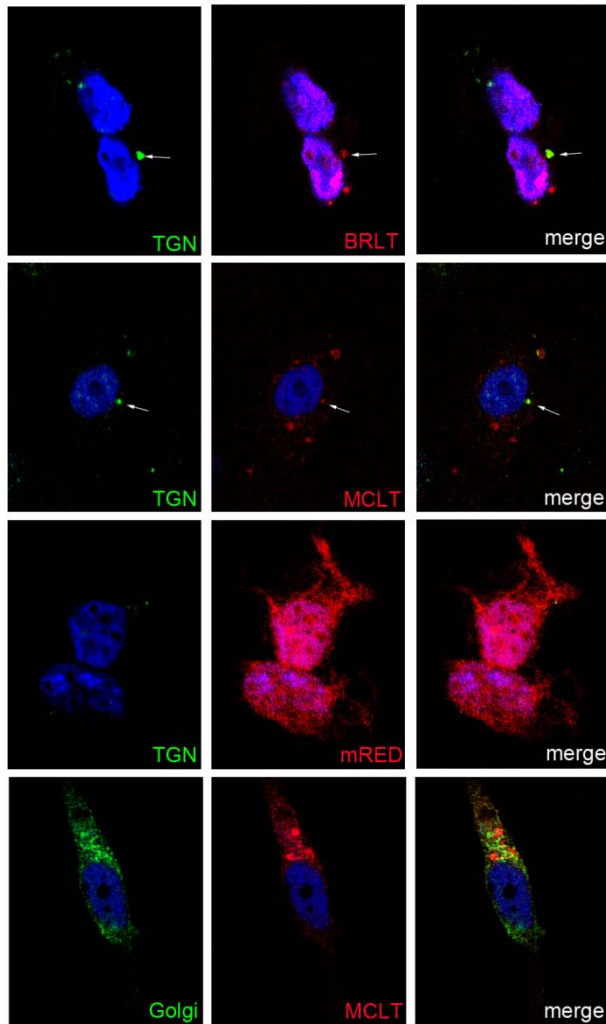

17

18 **Figure S3**

19 **DN-MyoVa Co-localizes with TGN but not Golgi Markers in virus Infected HEp-2 Cells.** HEp-2 cells were  
20 transfected with mRED-DN-myoVa BRLT (upper row), MCLT (second row from top and bottom row), or  
21 an mRED control construct (third row from top), and at 28.5 hours post transfection were infected with  
22 HSV-1(F) at an MOI of 5. At 15.5 hpi cells were washed with PBS, fixed in 3% PFA for 15 minutes, and

23 permeabilized with 0.1% Triton-X 100. Fixed cells were immunostained with mouse anti-TGN (top 3  
24 rows) or mouse anti-Golgi markers (bottom row). Rabbit anti-ICP8 was used to mark the infected cell  
25 nuclei. Red: DN-myoVa or mRED control; green: TGN and Golgi; blue: ICP8. Arrows indicate sites of co-  
26 localization of the respective markers.

27

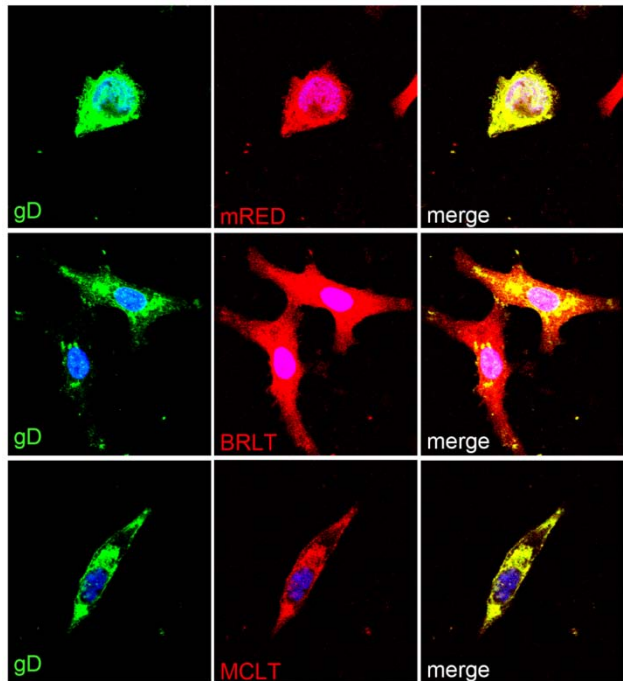

28

29 **Figure S4**

30 **mRED-DN-myoVa expression does not preclude gD expression.** HEp-2 cells were transfected with  
31 either mRED-DN-myoVa-BRLT, mRED-DN-myoVa-MCLT or mRED control vector. At 30 hours post  
32 transfection, the cells were infected with 5.0 PFU per cell of HSV-1(F). At 15.5 hpi the cells were fixed in  
33 3% PFA, autofluorescence was quenched by immersion in 50 mM NH<sub>4</sub>Cl for 15 minutes and the cells  
34 were permeabilized with 0.1% Triton-X 100 for 2 minutes followed by a 10 minute block in 10% human  
35 serum in PBS. Cells were immunostained with a gD monoclonal antibody and ICP8 antibody. Green: gD,  
36 blue: ICP8, red: DN-myoVa or mRED control.
